# Supplementary material for: Epitope-Based Immunoinformatics Approach on Nucleocapsid Protein of Severe Acute Respiratory Syndrome-Coronavirus-2
Source: PubMed Central journal article supplement (PMC7663370; doi:10.3390/molecules25215088), 2020-11-02
Supplement: molecules-25-05088-s001.pdf [file molecules-25-05088-s001.pdf]

# Supplementary Materials

1 *Article*

## 2 **Epitope-Based Immunoinformatics Approach on** 3 **Nucleocapsid Protein of Severe Acute Respiratory** 4 **Syndrome-Coronavirus-2**

5 **Ahmed Rakib**<sup>1</sup>, **Saad Ahmed Sami**<sup>1</sup>, **Md. Ashiqul Islam**<sup>1,2</sup>, **Shahriar Ahmed**<sup>1</sup>, **Farhana Binta Faiz**<sup>1</sup>,  
6 **Bibi Humayra Khanam**<sup>1</sup>, **Kay Kay Shain Marma**<sup>1</sup>, **Maksuda Rahman**<sup>1</sup>, **Mir Muhammad Nasir Uddin**<sup>1</sup>,  
7 **Firzan Nainu**<sup>3</sup>, **Talha Bin Emran**<sup>4,\*</sup> and **Jesus Simal-Gandara**<sup>5,\*</sup>

8 <sup>1</sup> Department of Pharmacy, Faculty of Biological Sciences, University of Chittagong, Chittagong-4331, Bangladesh;  
9 rakib.pharmacy.cu@gmail.com (A.R.); s.a.sami18pharm@gmail.com (S.A.S.); ashiquanik@gmail.com (M.A.I.);  
10 shahriarahmed65@gmail.com (S.A.); farhanafaiz037@gmail.com (F.B.F.); humayra.Khanam@cu.ac.bd (B.H.K.);  
11 kkshainapu@gmail.com (K.K.S.M.); maksudarahman777@gmail.com (M.R.); nasimir@cu.ac.bd (M.M.N.U.)

12 <sup>2</sup> Department of Pharmacy, Mawlana Bhashani Science & Technology University, Santosh, Tangail-1902,  
13 Bangladesh; ashiquanik@gmail.com (M.A.I.)

14 <sup>3</sup> Faculty of Pharmacy, Hasanuddin University, Tamalanrea, Kota Makassar, Sulawesi Selatan 90245, Indonesia;  
15 firzannainu@unhas.ac.id (F.N.)

16 <sup>4</sup> Department of Pharmacy, BGC Trust University Bangladesh, Chittagong-4381, Bangladesh

17 <sup>5</sup> Nutrition and Bromatology Group, Department of Analytical and Food Chemistry, Faculty of Food Science and  
18 Technology, University of Vigo–Ourense Campus, E32004 Ourense, Spain

19 \* Correspondence: jsimal@uvigo.es (J.S.-G.); talhabmb@bgctub.ac.bd (T.B.E.)

20 Tel.: +34-988-387000 (J.S.G.); +88-01819-942214 (T.B.E.)

21

22 **Table S1.** Scores from the combined B-cell linear epitope prediction.  
23

| <b>Method</b>                             | <b>Score</b>   |                |                |
|-------------------------------------------|----------------|----------------|----------------|
|                                           | <b>Maximum</b> | <b>Average</b> | <b>Minimum</b> |
| BepiPred Linear Epitope Prediction        | 2.416          | 0.813          | -0.001         |
| Chou and Fasman Beta-Turn Prediction      | 1.439          | 1.070          | 0.610          |
| Emini Surface Accessibility Prediction    | 7.006          | 1.000          | 0.050          |
| Karplus and Schulz Flexibility Prediction | 1.161          | 1.035          | 0.885          |
| Kolaskar and Tongaonkar Antigenicity      | 1.197          | 0.988          | 0.874          |
| Parker Hydrophilicity Prediction          | 6.871          | 2.800          | -5.971         |

24 **Table S2.** Predicted B cell epitopes linear with the previous studies from Grifoni *et al.*, and Amrun *et al.*

25

| No. | Start | End | Peptide                          | Length |
|-----|-------|-----|----------------------------------|--------|
| 1   | 361   | 390 | KTFPPTPEPKKDKKKKKADETQALPQRQKKQQ | 30     |
| 2   | 52    | 59  | WFTALTQH                         | 8      |
| 3   | 154   | 166 | NAAIVLQLPQGTT                    | 13     |
| 4   | 347   | 363 | KDQVILLNKHIDAYKTF                | 17     |
| 5   | 379   | 385 | TQALPQR                          | 7      |
| 6   | 389   | 401 | QQTVTLLPAADLD                    | 13     |
| 7   | 365   | 377 | PTEPKKDKKKKAD                    | 13     |
| 8   | 384   | 390 | QRQKKQQ                          | 7      |

26

27

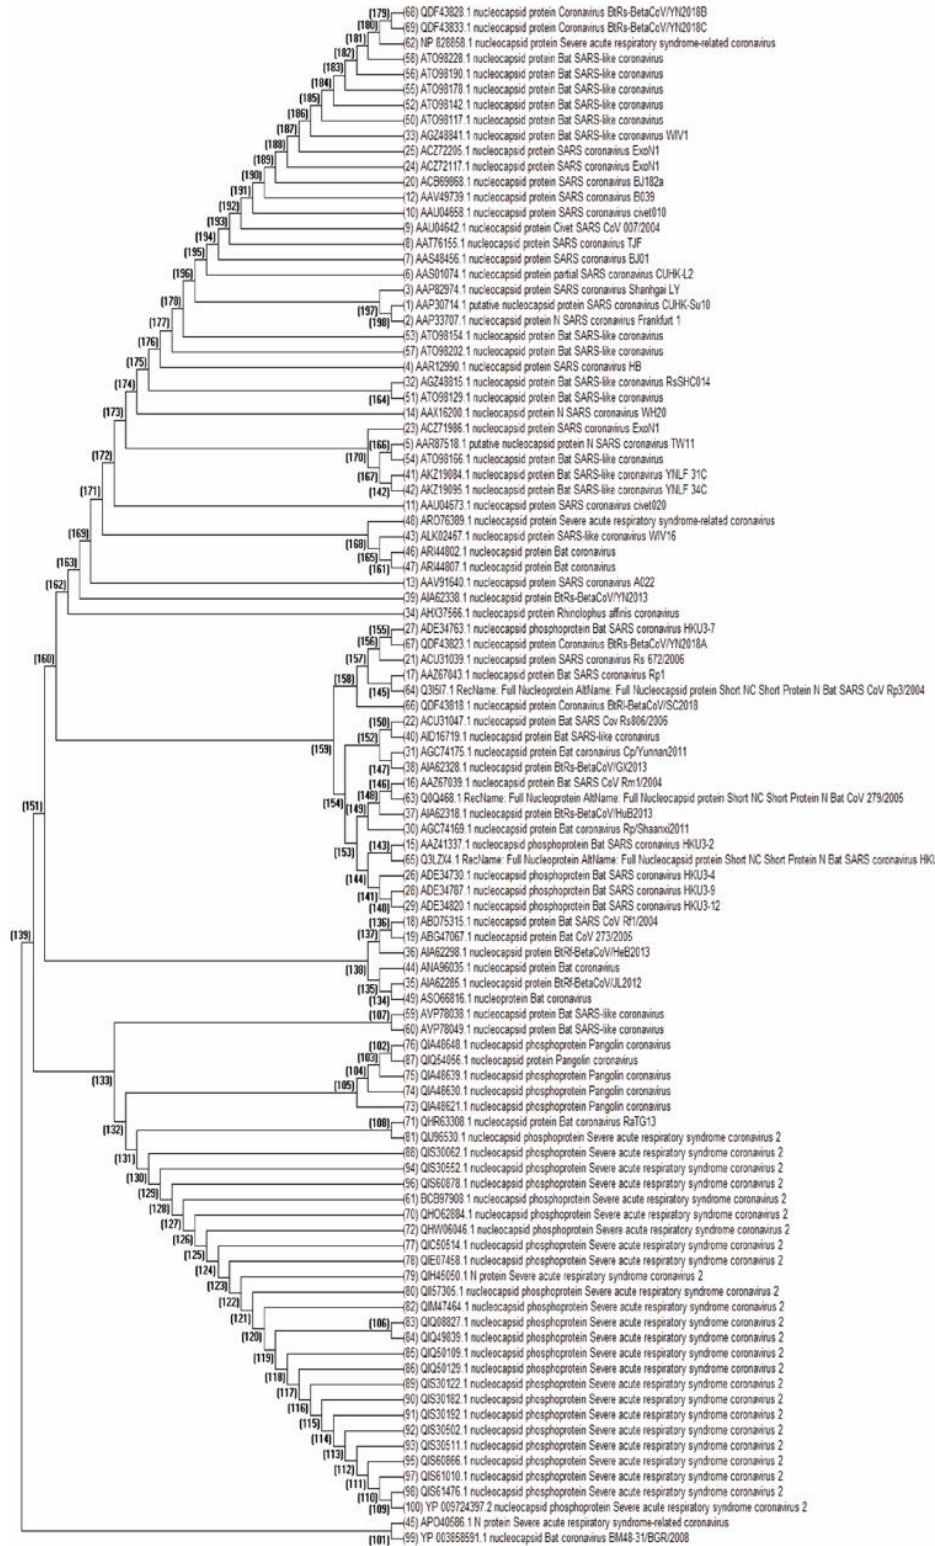

28

29 **Figure S1:** Evolutionary divergence analysis of available N proteins of different strains; results are  
 30 represented in a phylogenetic tree.

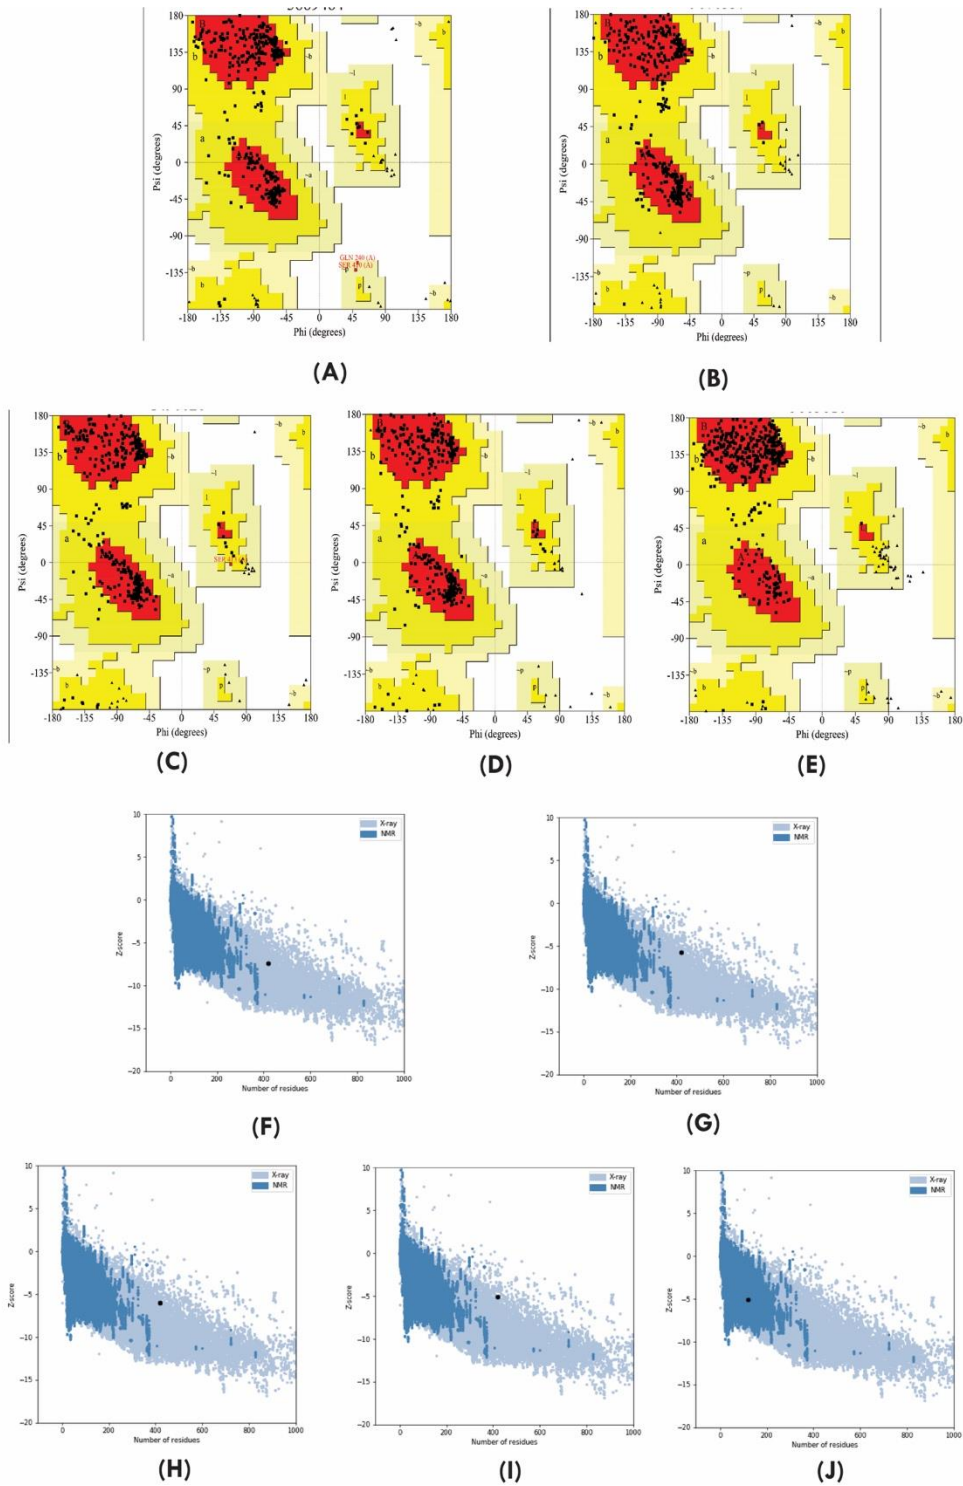

31  
32

33 **Figure S2:** (A) Ramachandran plot analysis for model 1; (B) Ramachandran plot analysis for model 2; (C)  
34 Ramachandran plot analysis for model 3; (D) Ramachandran plot analysis for model 5; (E)  
35 Ramachandran plot analysis for the crystal structure of SARS-CoV-2 N protein (PDB ID; 6M3M); (F) Z-  
36 score for model 1; (G) Z-score for model 2; (H) Z-score for model 3; (I) Z-score for model 5; (J) Z-score for  
37 the crystal structure of SARS-CoV-2 N protein (PDB ID; 6M3M).

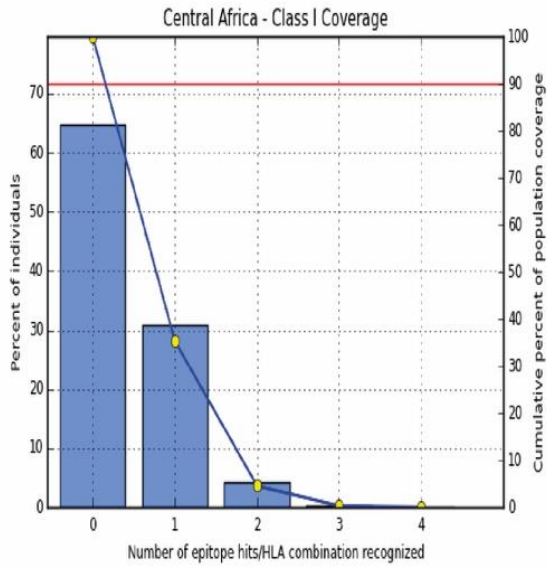

(A)

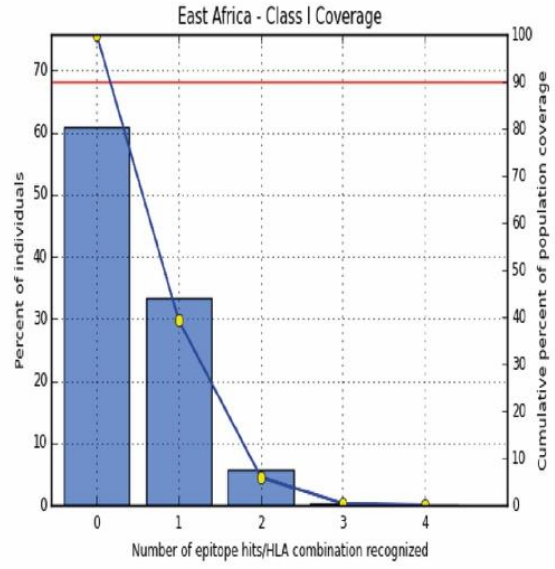

(B)

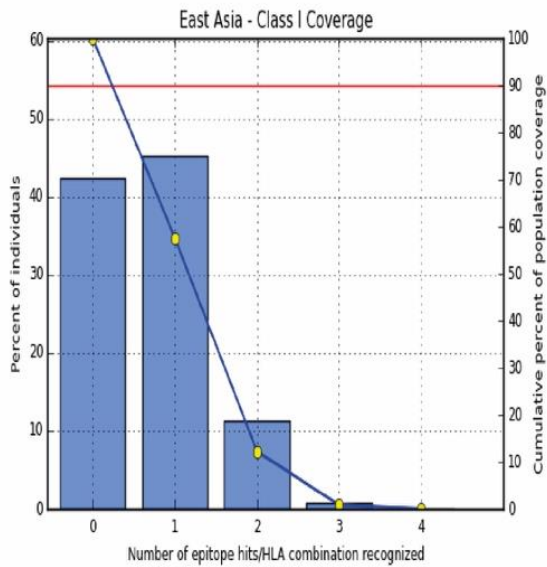

(C)

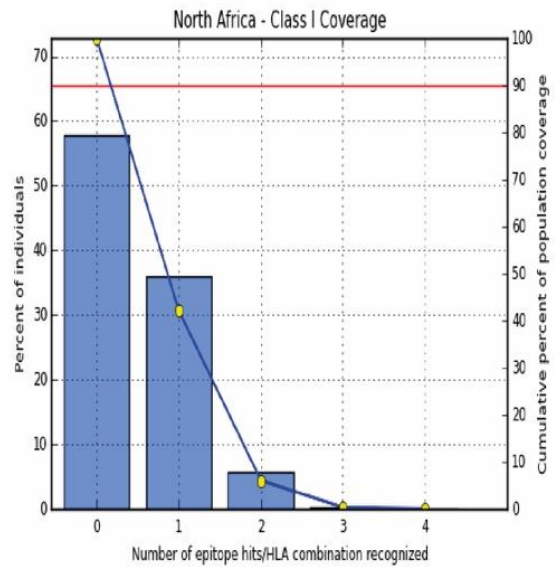

(D)

39

40 **Figure S3:** Population coverage based on MHC restriction data for (A) Central Africa; (B) East Africa; (C)  
 41 East Asia; (D) North Africa - using the Immune Epitope Database analysis resource.

42



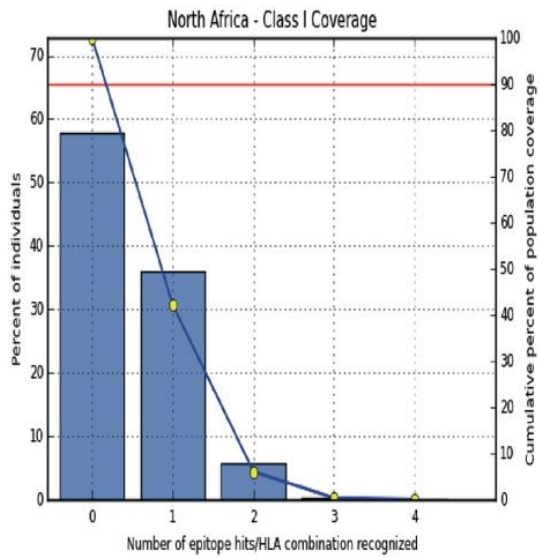

(A)

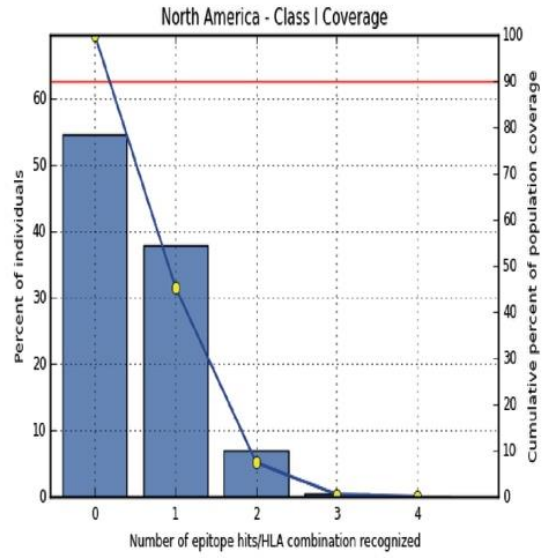

(B)

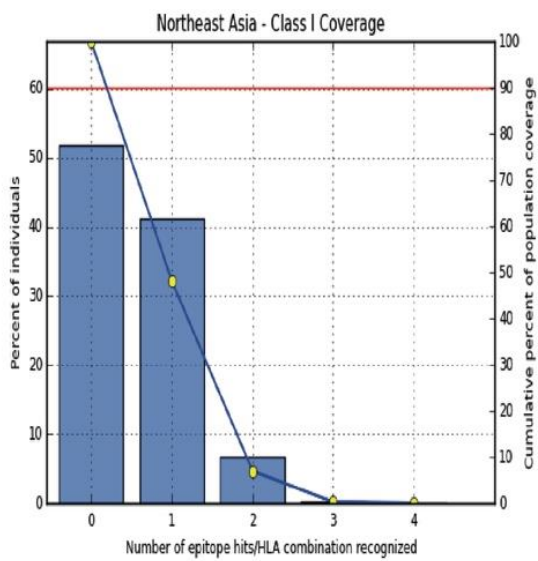

(C)

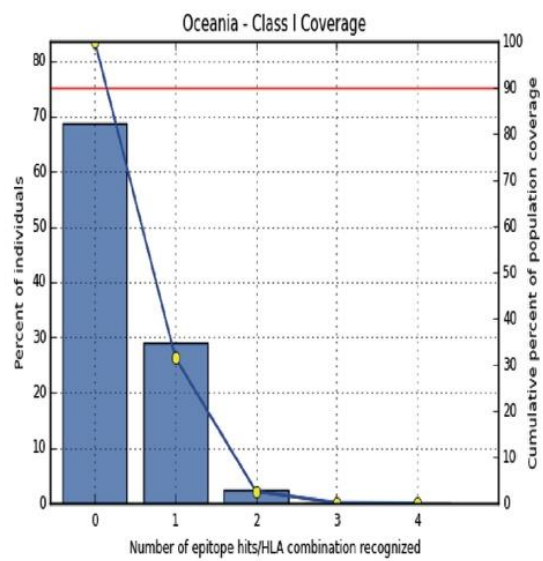

(D)

43

44

45 **Figure S4:** Population coverage based on MHC restriction data for (A) North Africa; (B) North America;  
 46 (C) Northeast Asia; (D) Oceania - using the Immune Epitope Database analysis resource.

47

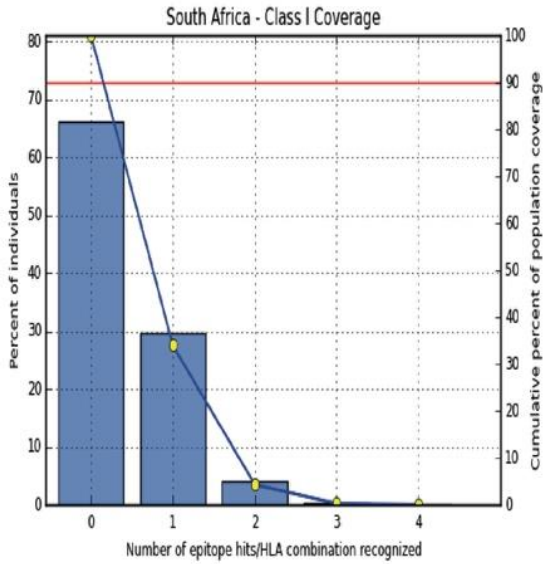

(A)

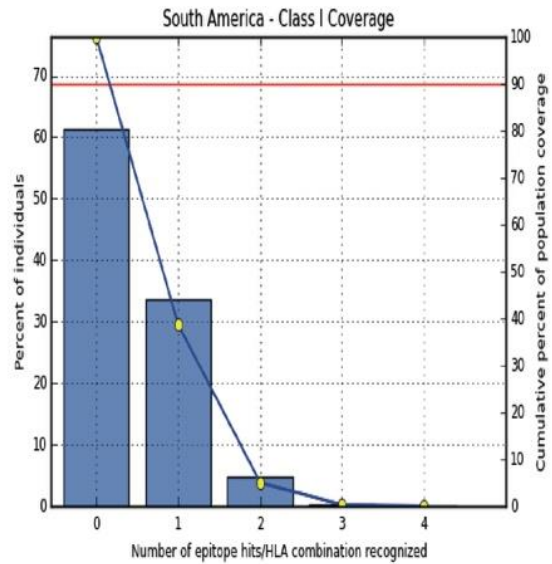

(B)

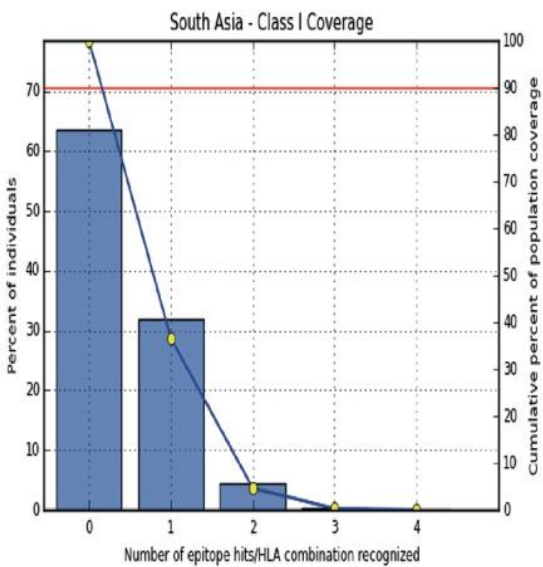

(C)

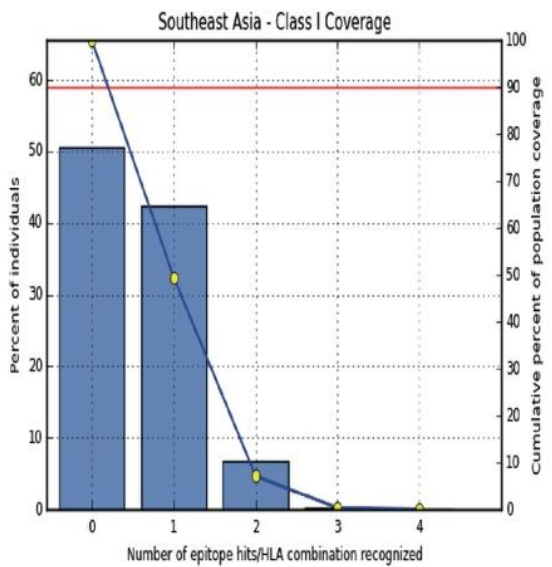

(D)

48

49

50 **Figure S5:** Population coverage based on MHC restriction data for (A) South Africa; (B) South America;

51 (C) South Asia; (D) Southeast Asia - using the Immune Epitope Database analysis resource.

52



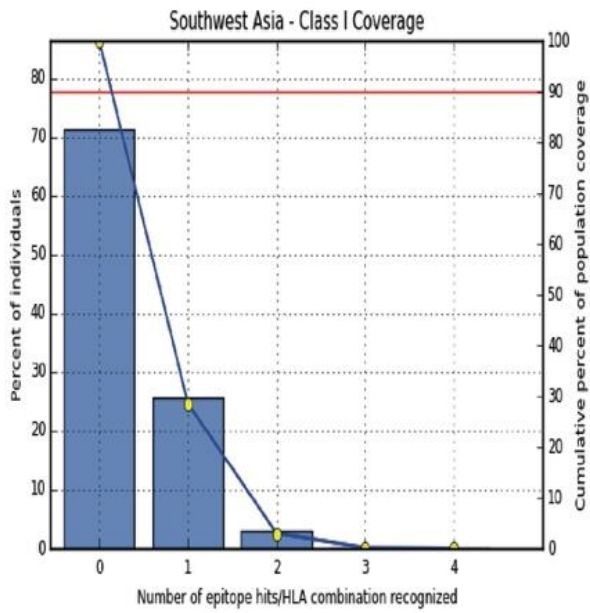

(A)

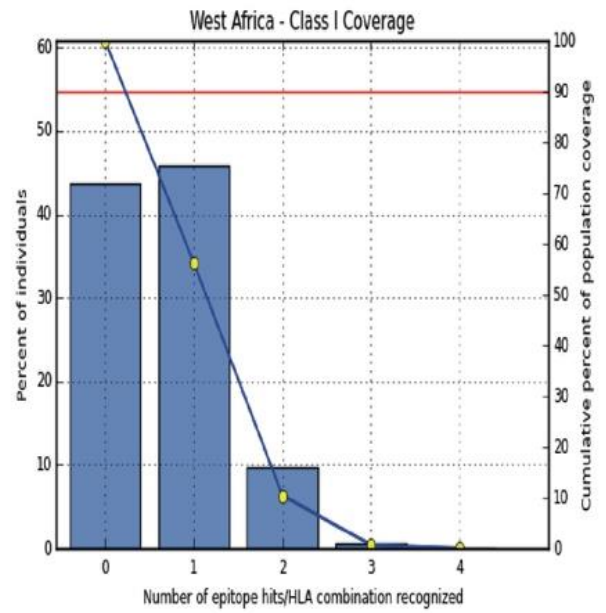

(B)

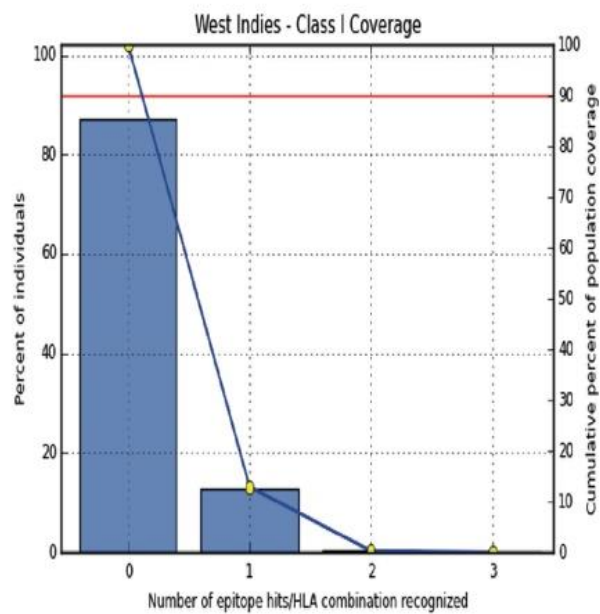

(C)

53

54 **Figure S6:** Population coverage based on MHC restriction data for (A) Southwest Asia; (B) West Africa;  
 55 (C) West Indies - using the Immune Epitope Database analysis resource.

56
